# Supplementary material for: UBE2T promotes β‐catenin nuclear translocation in hepatocellular carcinoma through MAPK/ERK‐dependent activation
Source: PubMed Central journal article supplement (PMC9019890; doi:10.1002/1878-0261.13111), 2022-03-16

**Table S1.** List of primary and secondary antibodies used in this study.

| Antibodies                | Antigen              | Clone | Species    | Company                  | Cat. number | Dilution |
|---------------------------|----------------------|-------|------------|--------------------------|-------------|----------|
| <b>Primary antibodies</b> | UBE2T                | 4E5   | mAb mouse  | Santa Cruz Biotechnology | sc-100623   | 1:200    |
|                           | E-cadherin           | H-108 | pAb rabbit | Santa Cruz Biotechnology | sc-7870     | 1:500    |
|                           | $\beta$ -catenin     | E5    | mAb mouse  | Santa Cruz Biotechnology | sc-7963     | 1:200    |
|                           | Fibronectin          | EP5   | mAb mouse  | Santa Cruz Biotechnology | sc-8422     | 1:500    |
|                           | Slug                 | A7    | mAb mouse  | Santa Cruz Biotechnology | sc-166476   | 1:200    |
|                           | $\alpha$ -tubulin    | B7    | mAb mouse  | Santa Cruz Biotechnology | sc-5286     | 1:500    |
|                           | AKT                  | C67E7 | mAb rabbit | Cell Signaling           | 4691        | 1:1000   |
|                           | p-AKT (T308)         | D25E6 | mAb rabbit | Cell Signaling           | 13038       | 1:500    |
|                           | p-AKT (S473)         | D9E   | mAb rabbit | Cell Signaling           | 4060        | 1:500    |
|                           | mTOR                 | 7C10  | mAb rabbit | Cell Signaling           | 2983        | 1:1000   |
|                           | pmTOR (S2448)        |       | pAb rabbit | Cell Signaling           | 2971        | 1:500    |
|                           | c-MYC                | 9E10  | mAb mouse  | Santa Cruz Biotechnology | sc-40       | 1:200    |
|                           | Pan Ras              | C-4   | mAb mouse  | Santa Cruz Biotechnology | sc-166691   | 1:200    |
|                           | Raf-1                | C-12  | pAb rabbit | Santa Cruz Biotechnology | sc-133      | 1:200    |
|                           | p-Raf-1/c-RAF (S259) |       | pAb rabbit | Cell Signaling           | 9421        | 1:500    |
|                           | p-Raf-1/c-RAF (S338) | 56A6  | mAb rabbit | Cell Signaling           | 9427        | 1:500    |
|                           | p-Raf-1 (S621)       | E-1   | mAb mouse  | Santa Cruz Biotechnology | sc-271929   | 1:500    |

**Table S1.** List of primary and secondary antibodies used in this study.

| <b>Antibodies</b>           | <b>Antigen</b>              | <b>Clone</b> | <b>Species</b> | <b>Company</b>           | <b>Cat. number</b> | <b>Dilution</b> |
|-----------------------------|-----------------------------|--------------|----------------|--------------------------|--------------------|-----------------|
| <b>Primary antibodies</b>   | MEK1/2                      |              | pAb rabbit     | Cell Signaling           | 9122               | 1:1000          |
|                             | p-MEK1/2 (S217/221)         | 41G9         | mAb rabbit     | Cell Signaling           | 9154               | 1:1000          |
|                             | ERK1/2                      | C-9          | mAb mouse      | Santa Cruz Biotechnology | sc-514302          | 1:500           |
|                             | p-ERK1/2 (Y204)             | E-4          | mAb mouse      | Santa Cruz Biotechnology | sc-7383            | 1:500           |
|                             | Bcl-2                       | C-2          | mAb mouse      | Santa Cruz biotechnology | sc-7382            | 1:100           |
|                             | Bax                         | B-9          | mAb mouse      | Santa Cruz Biotechnology | sc-7480            | 1:200           |
|                             | Elk-1                       | E-5          | mAb mouse      | Santa Cruz Biotechnology | sc-365876          | 1:100           |
|                             | p-Elk-1                     | B-4          | mAb mouse      | Santa Cruz Biotechnology | sc-8406            | 1:100           |
|                             | GAPDH                       | 0411         | mAb mouse      | Santa Cruz Biotechnology | sc-47724           | 1:2000          |
|                             | Histone H3                  | 1G1          | mAb mouse      | Santa Cruz Biotechnology | sc-517576          | 1:10000         |
| <b>Secondary antibodies</b> | anti-mouse HRP              |              |                | Santa Cruz Biotechnology | sc-516102          | 1:3000          |
|                             | anti-rabbit HRP             |              | mouse          | Santa Cruz Biotechnology | sc-2357            | 1:3000          |
|                             | anti-rabbit Alexa Fluor 488 |              | pAb goat       | Invitrogen               | A11008             | 1:500           |
|                             | anti-mouse Alexa Fluor 555  |              | pAb donkey     | Invitrogen               | A31570             | 1:500           |

**Figure S1.**

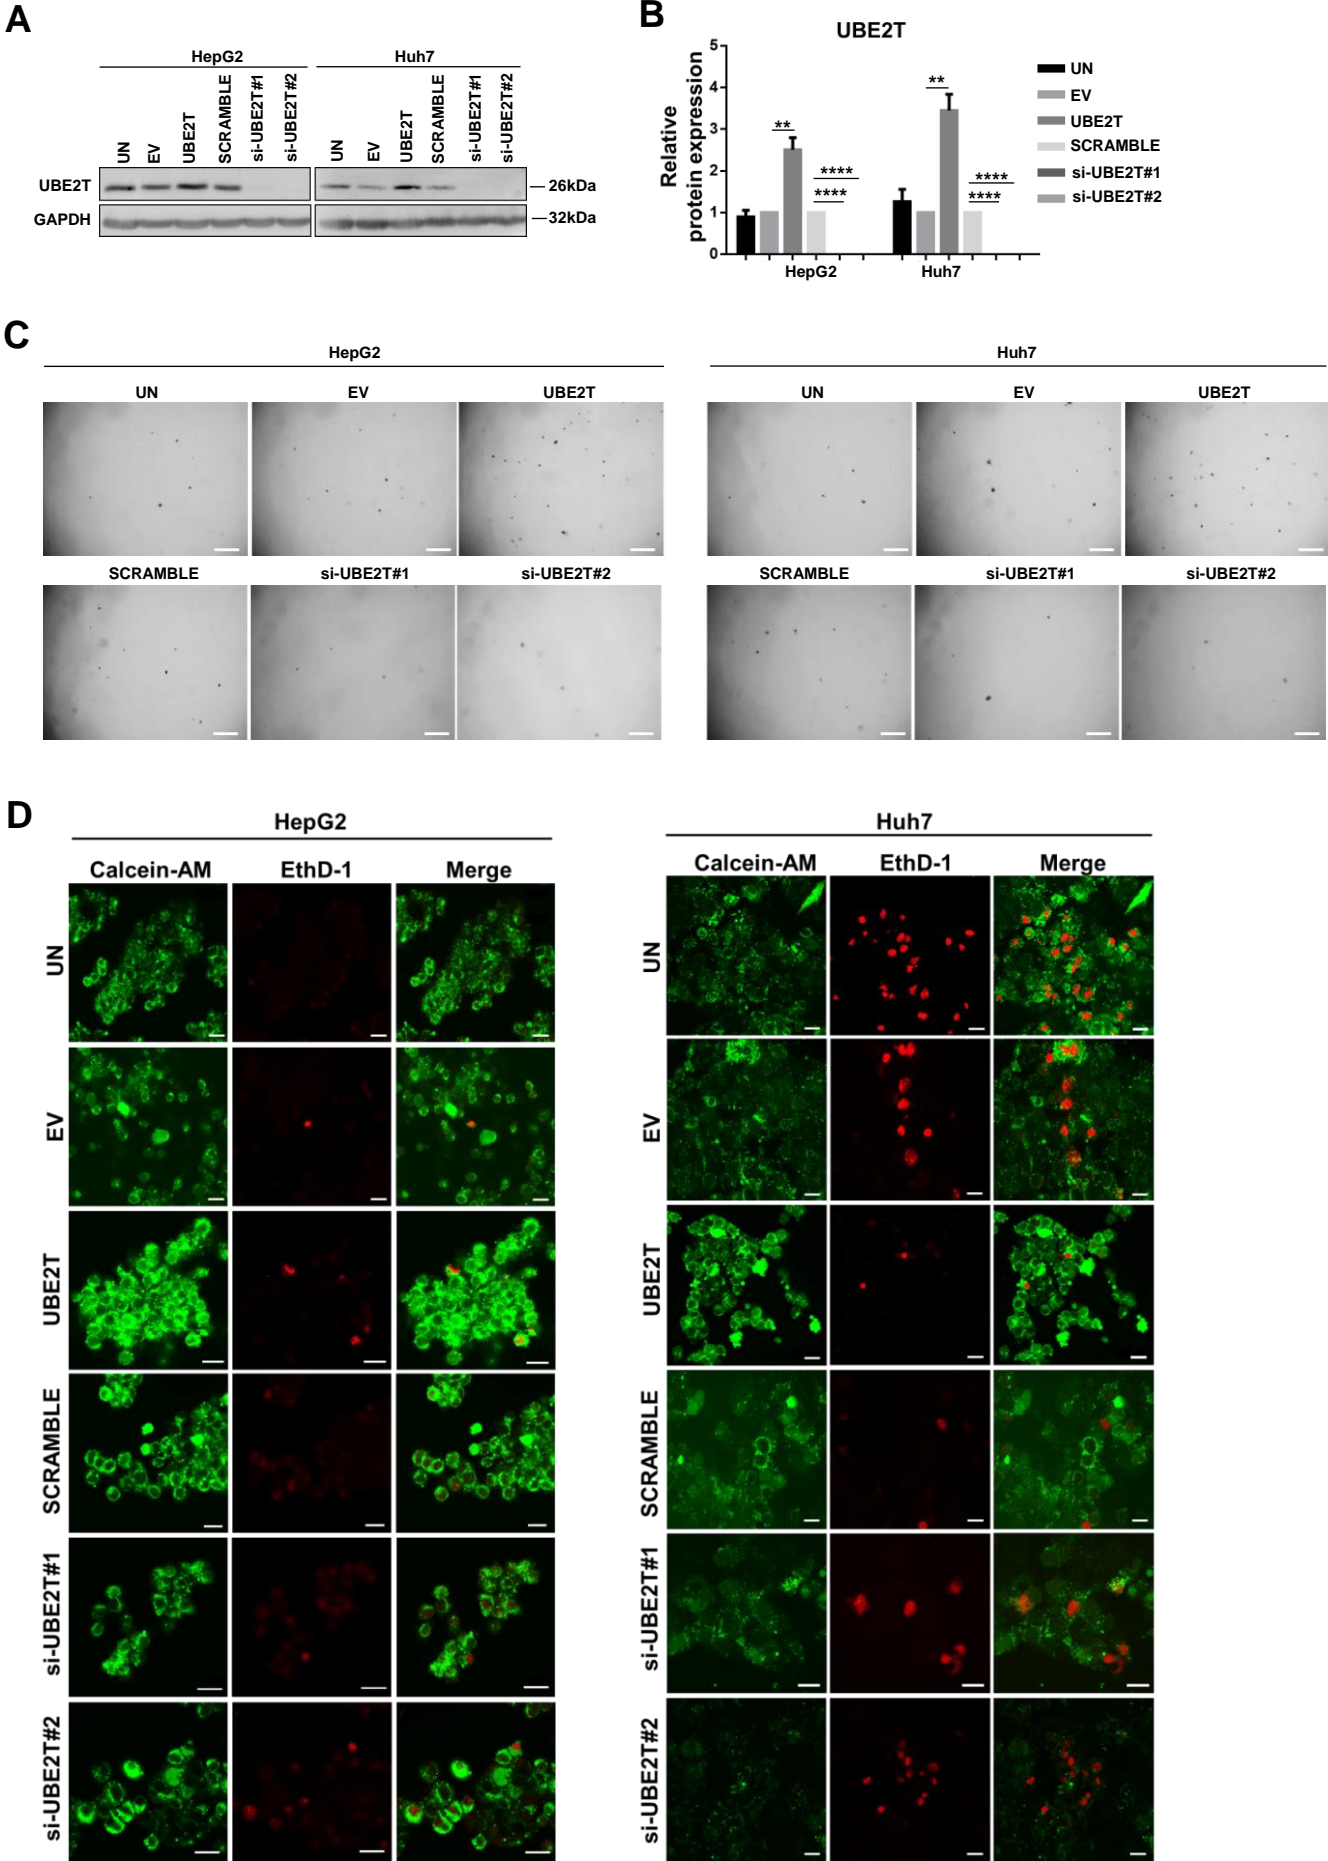

**Figure S1.**

**E**

| Treatment Group (HepG2)/Cell cycle phases | SubG1    | G0/G1    | S        | G2/M     | Polyploid |
|-------------------------------------------|----------|----------|----------|----------|-----------|
| UN                                        | 22.2±4.4 | 52.6±0.9 | 8.9±1.0  | 14.6±4.9 | 2.2±0.9   |
| EV                                        | 22.4±0.2 | 52.0±0.2 | 8.7±0.6  | 14.7±1.0 | 1.9±0.6   |
| UBE2T                                     | 9.9±3.8  | 44.0±4.2 | 3.5±1.1  | 27.7±3.5 | 16.3±4.0  |
| SCRAMBLE                                  | 18.8±4.5 | 56.0±0.4 | 12.1±1.2 | 12.2±4.4 | 1.8±0.3   |
| si-UBE2T#1                                | 21.9±3.2 | 57.7±1.4 | 9.9±1.7  | 11.5±0.9 | 1.3±0.7   |
| si-UBE2T#2                                | 14.4±2.7 | 61.1±2.4 | 7.7±1.6  | 15.1±4.0 | 1.5±0.8   |
| Treatment Group (Huh7)/Cell cycle phases  | SubG1    | G0/G1    | S        | G2/M     | Polyploid |
| UN                                        | 8.1±1.8  | 47.5±3.2 | 14.6±2.3 | 19.5±3.1 | 10.3±2.4  |
| EV                                        | 16.0±2.5 | 38.3±7.2 | 11.2±1.6 | 23.9±4.8 | 10.0±3.1  |
| UBE2T                                     | 48.4±6.2 | 17.6±5.6 | 11.1±2.5 | 16.3±4.5 | 6.2±3.4   |
| SCRAMBLE                                  | 15.9±3.9 | 42.7±4.1 | 9.1±1.4  | 20.4±5.6 | 11.2±3.4  |
| si-UBE2T#1                                | 16.1±2.3 | 55.5±2.5 | 7.6±0.9  | 12.6±5.5 | 6.8±3.1   |
| si-UBE2T#2                                | 16.8±3.8 | 59.5±2.6 | 5.8±0.9  | 12.8±4.8 | 4.6±2.5   |

**F**

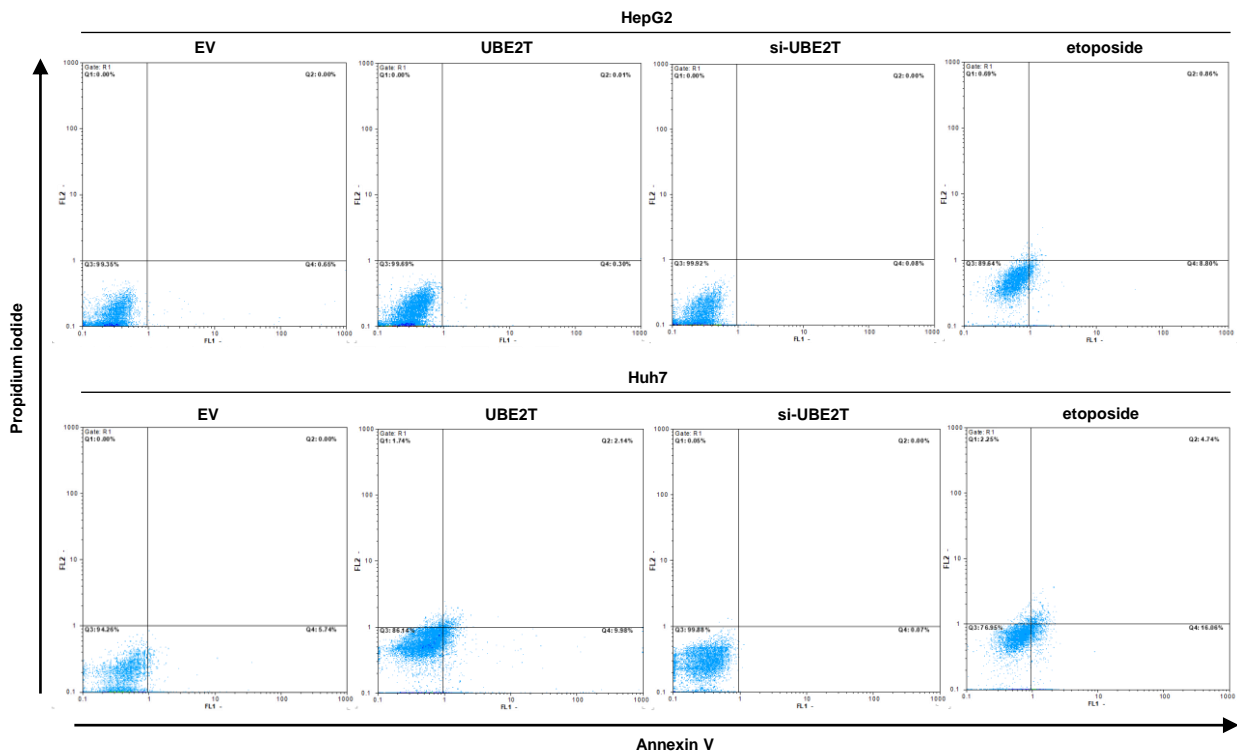

| Treatment Group (HepG2) | Live (Pi-/Annexin V <sup>-</sup> ) | Early apoptotic (Pi-/Annexin V <sup>+</sup> ) | Late apoptotic (Pi <sup>+</sup> /Annexin V <sup>-</sup> ) | Necrotic (Pi <sup>+</sup> /Annexin V <sup>+</sup> ) |
|-------------------------|------------------------------------|-----------------------------------------------|-----------------------------------------------------------|-----------------------------------------------------|
| EV                      | 99±0.5                             | 1±0.05                                        | 0±0                                                       | 0±0                                                 |
| UBE2T                   | 99.5±0.1                           | 0.5±0.02                                      | 0.1±0.002                                                 | 0±0                                                 |
| si-UBE2T                | 99.8±0.1                           | 0.05±0.01                                     | 0±0                                                       | 0±0                                                 |
| etoposide               | 89±0.3                             | 9±0.2                                         | 1±0.2                                                     | 1±0.5                                               |
| Treatment Group (Huh7)  |                                    |                                               |                                                           |                                                     |
| EV                      | 94±0.9                             | 6±0.3                                         | 0±0                                                       | 0±0                                                 |
| UBE2T                   | 85±1.1                             | 10±0.2                                        | 2±0.2                                                     | 2±0.3                                               |
| si-UBE2T                | 99.9±0.2                           | 0.1±0.01                                      | 0±0                                                       | 0.1±0.05                                            |
| etoposide               | 75±2                               | 17±1                                          | 5±0.5                                                     | 2.5±0.4                                             |

**Figure S2.**

**A**

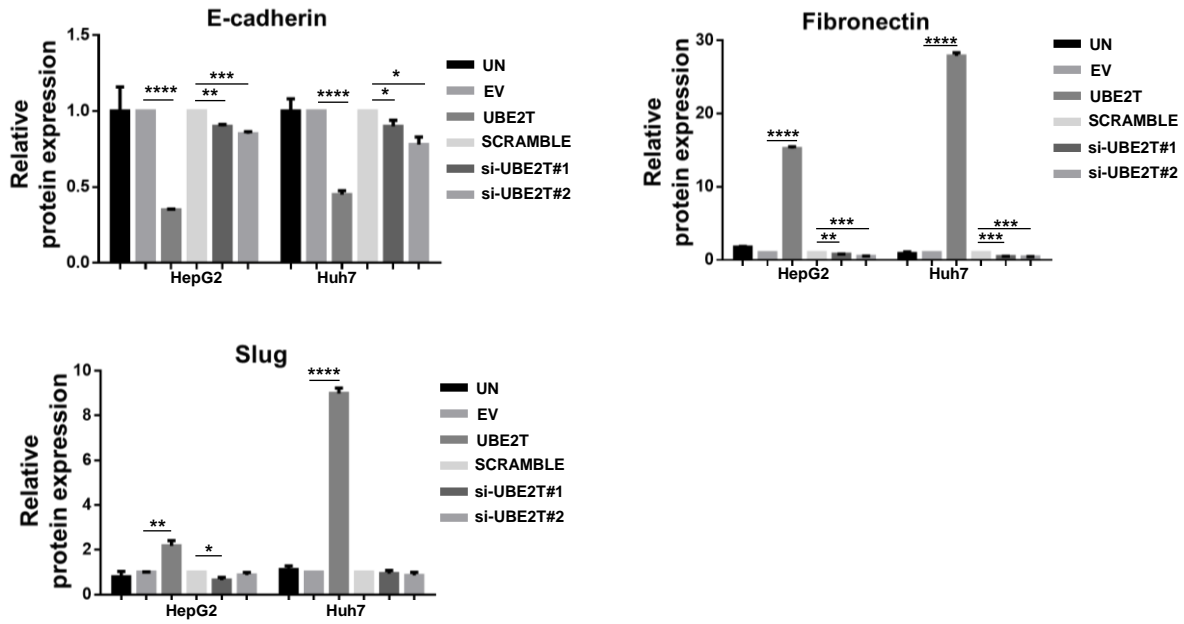

**B**

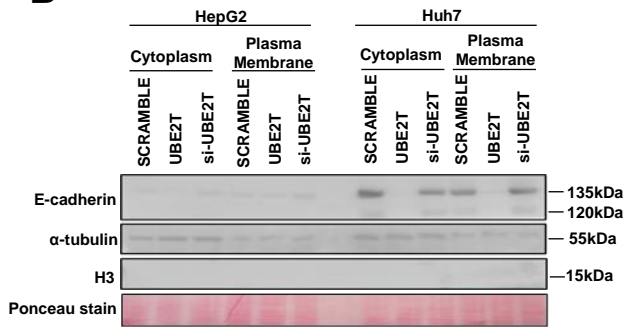

**C**

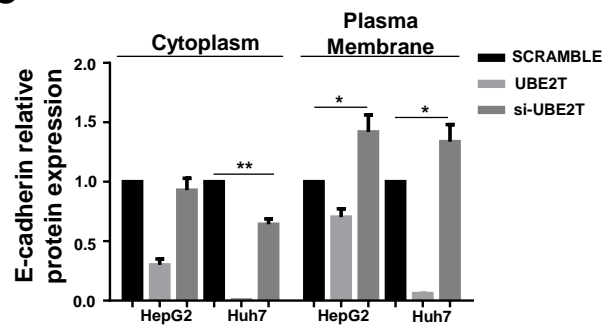

**D**

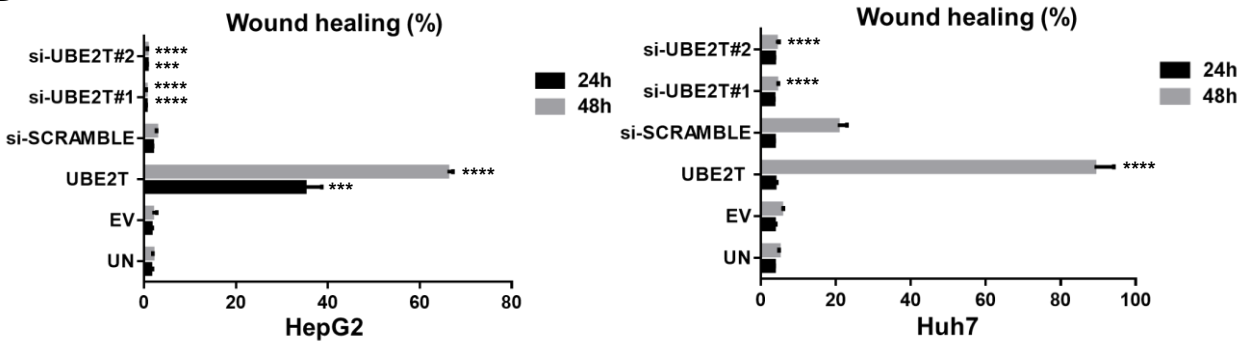

Figure S3.

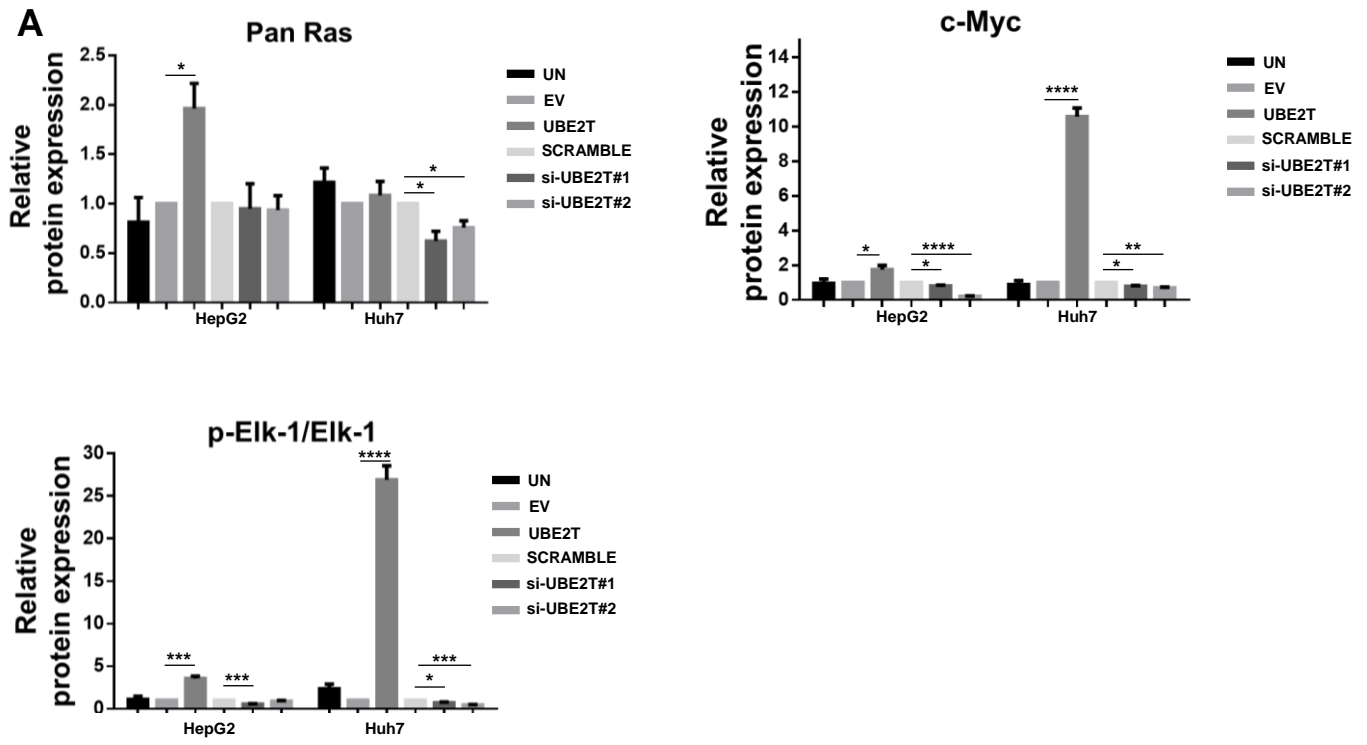

Figure S4.

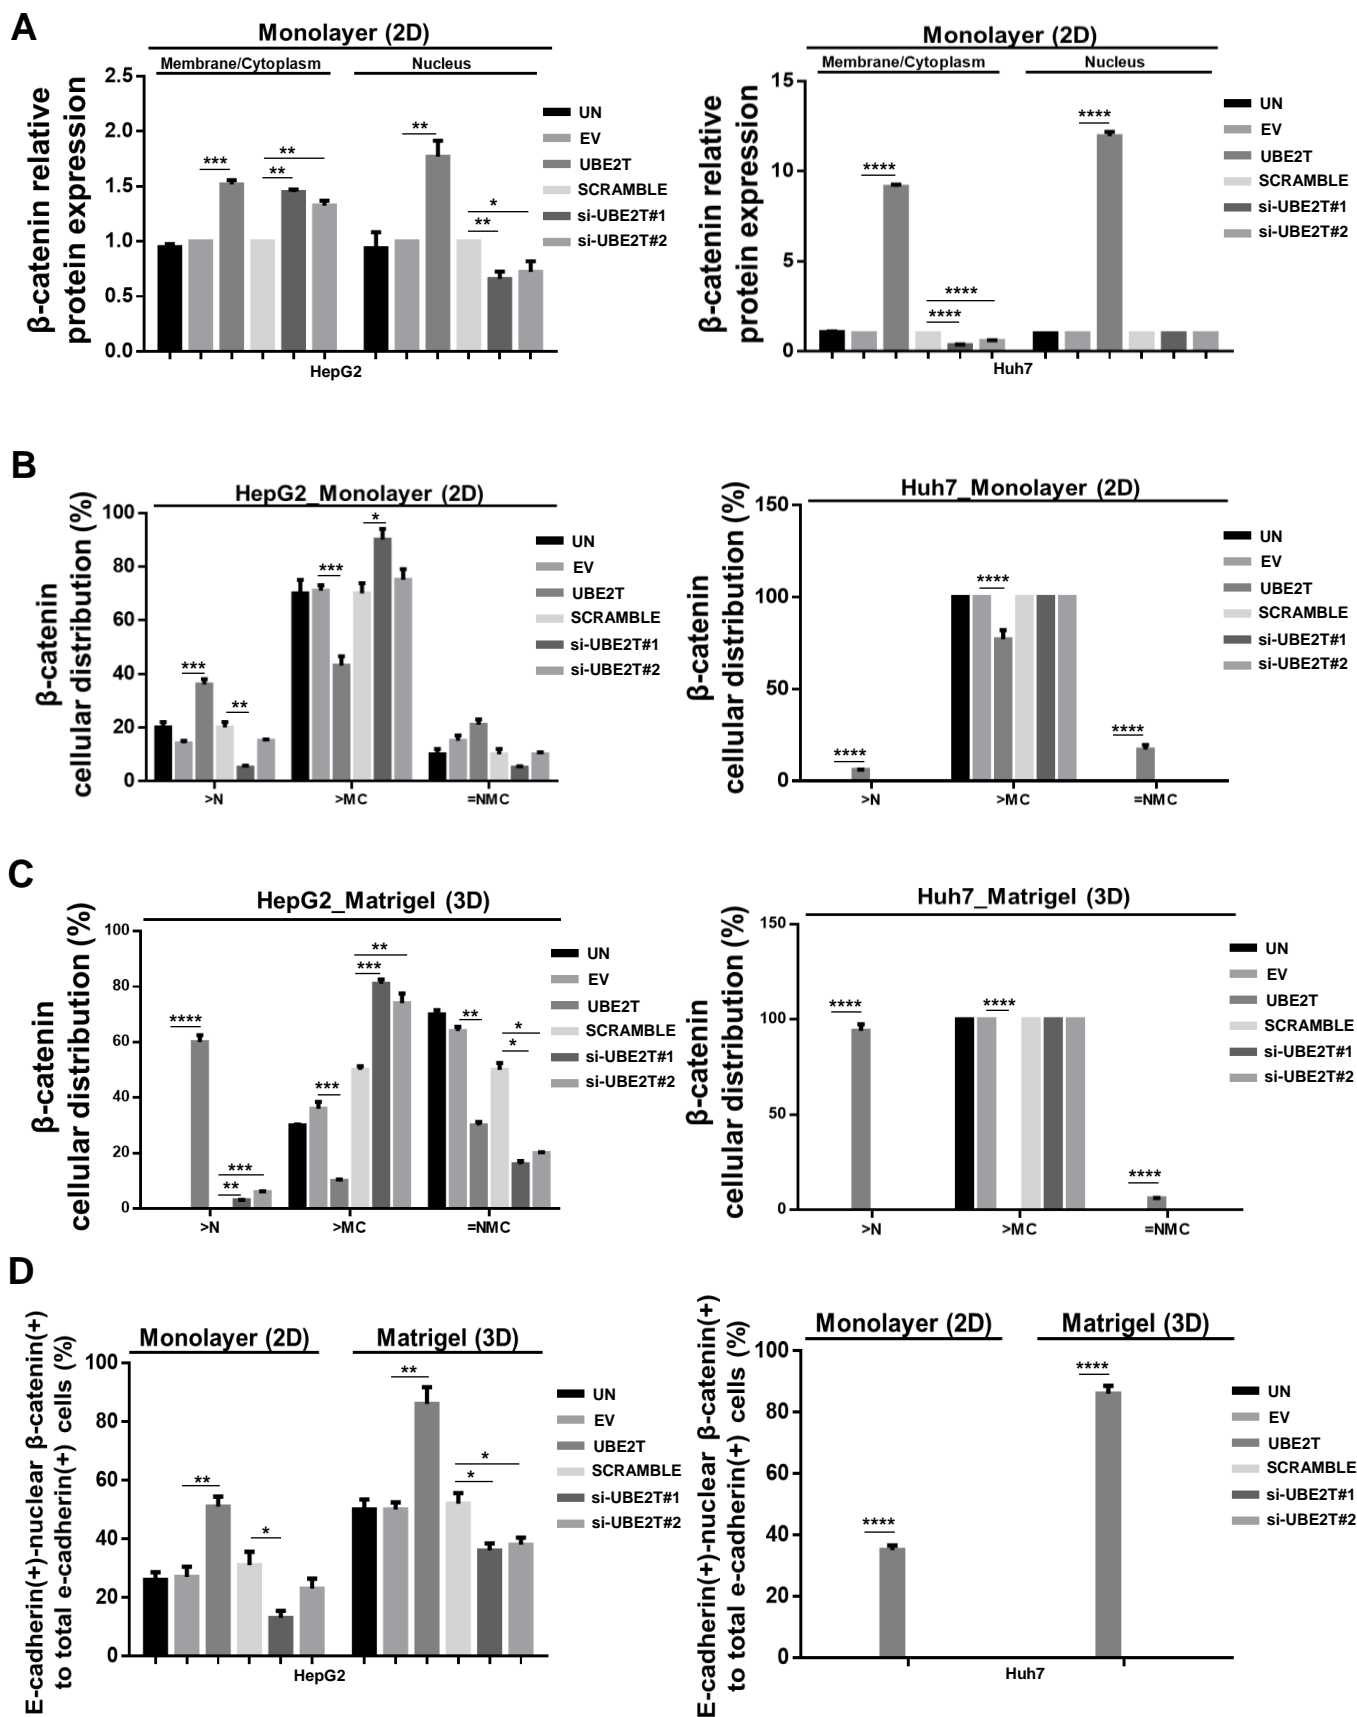

**Figure S5.**

**A**

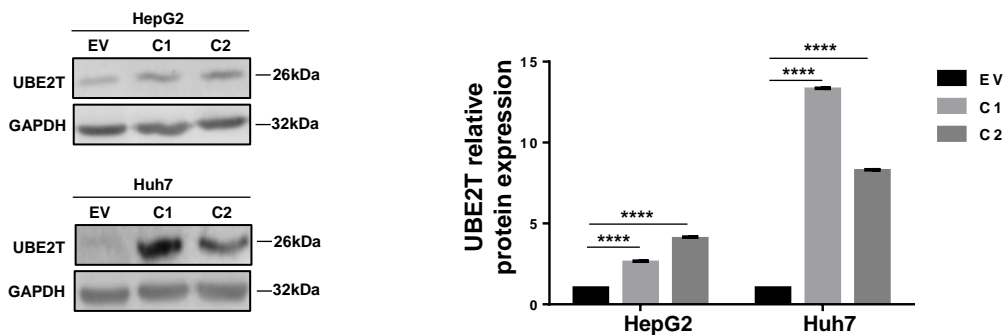

**B**

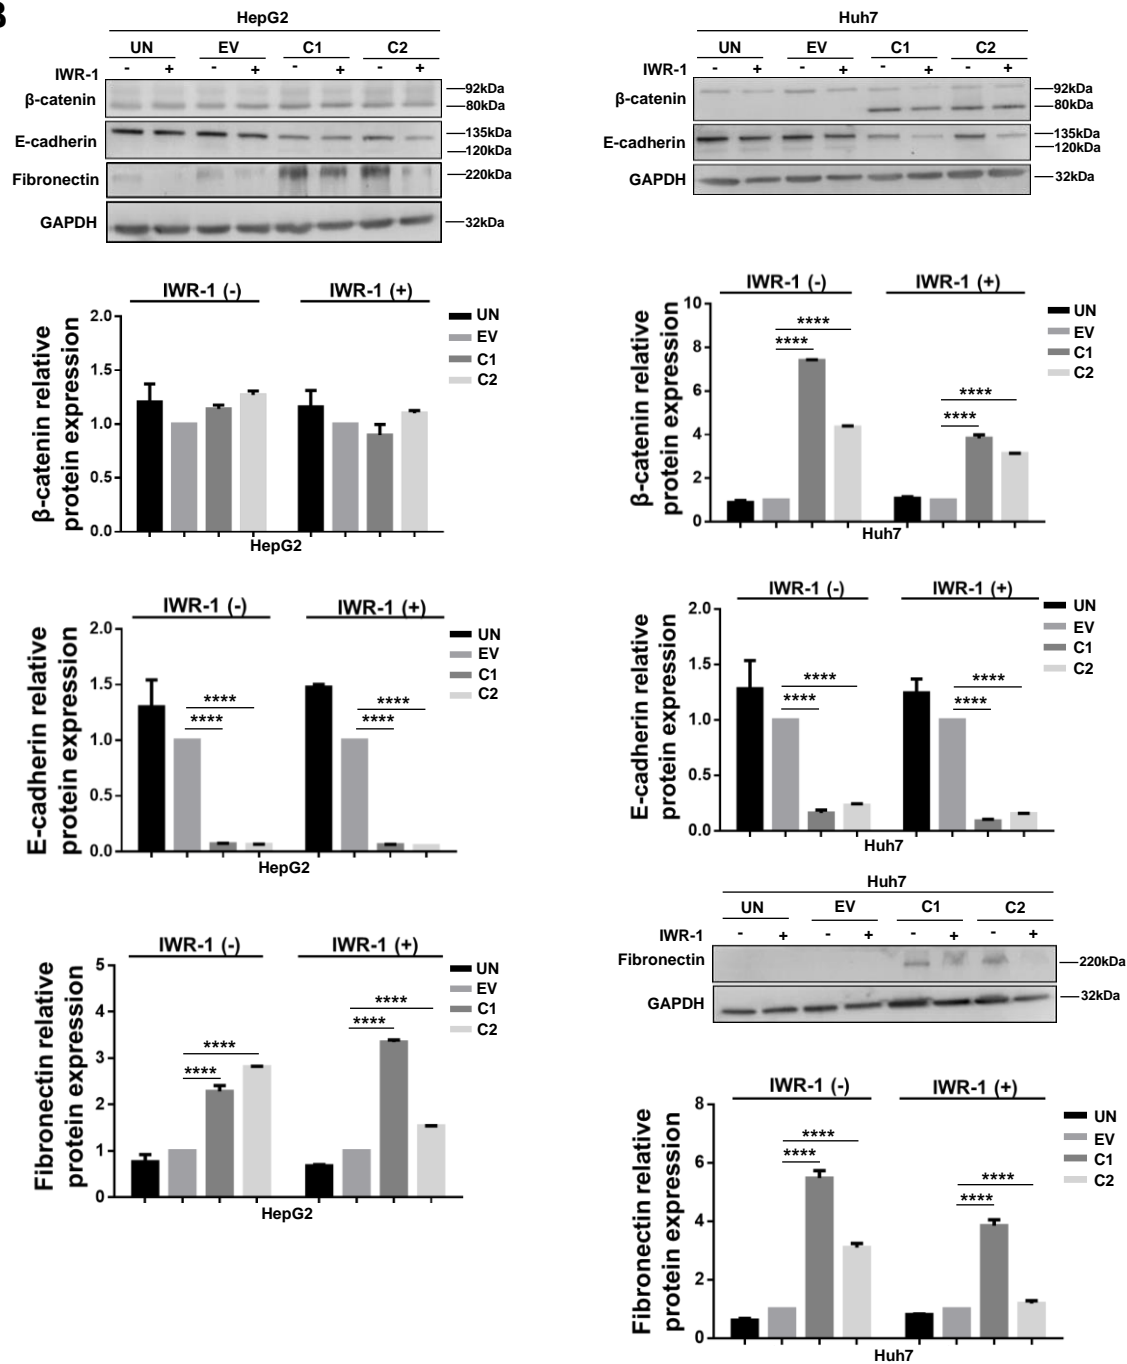



Figure S5.

C

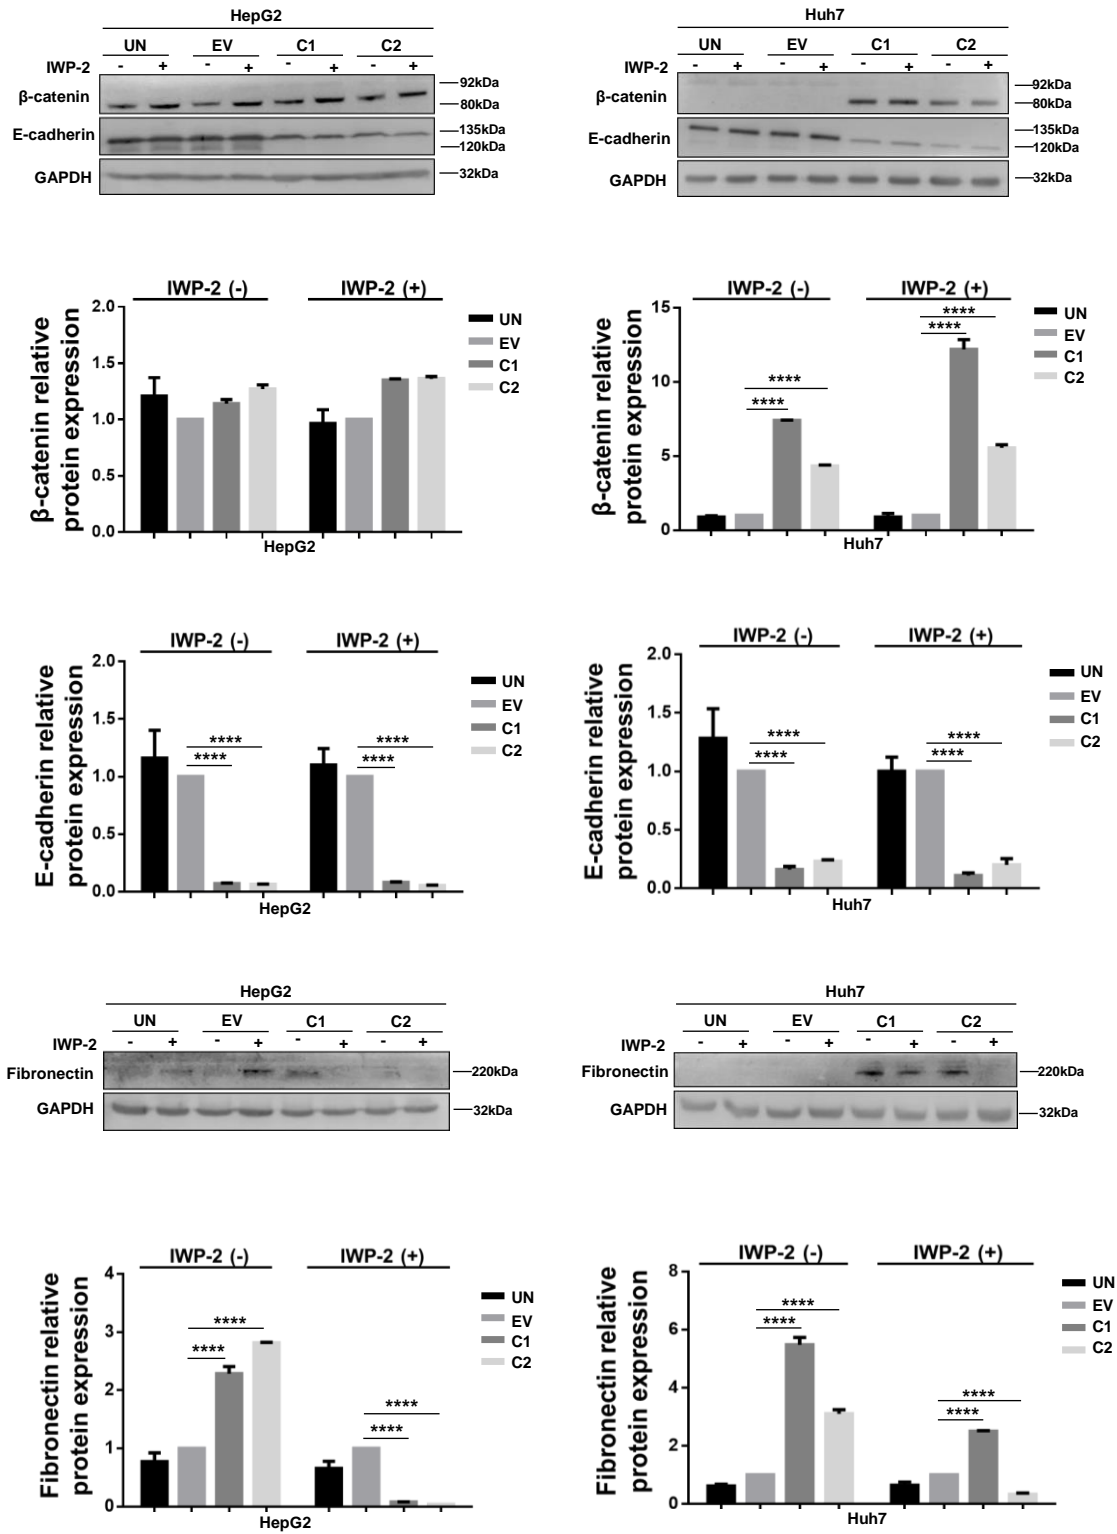

Figure S5.

D

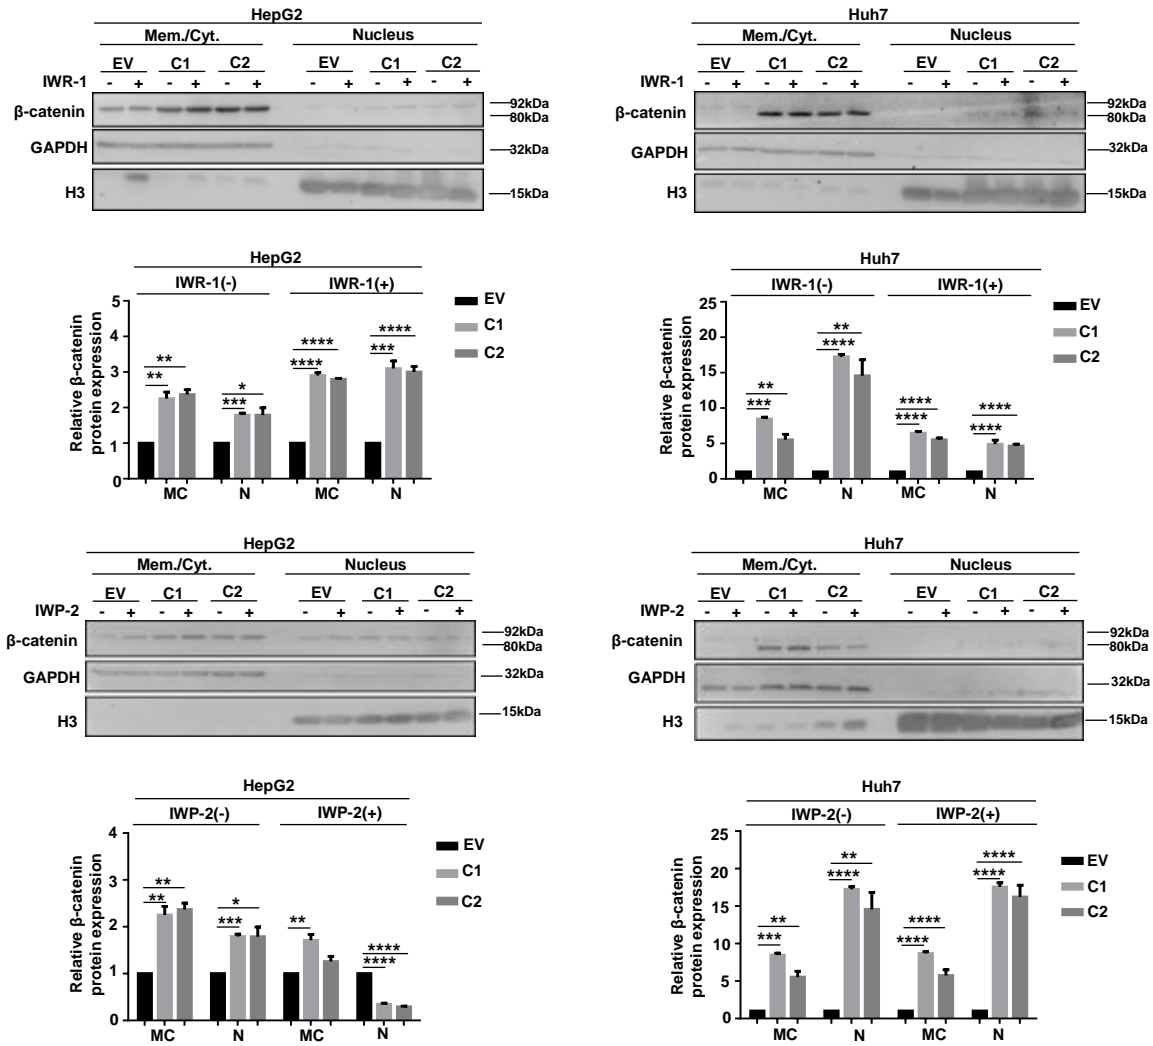

Figure S5.

E

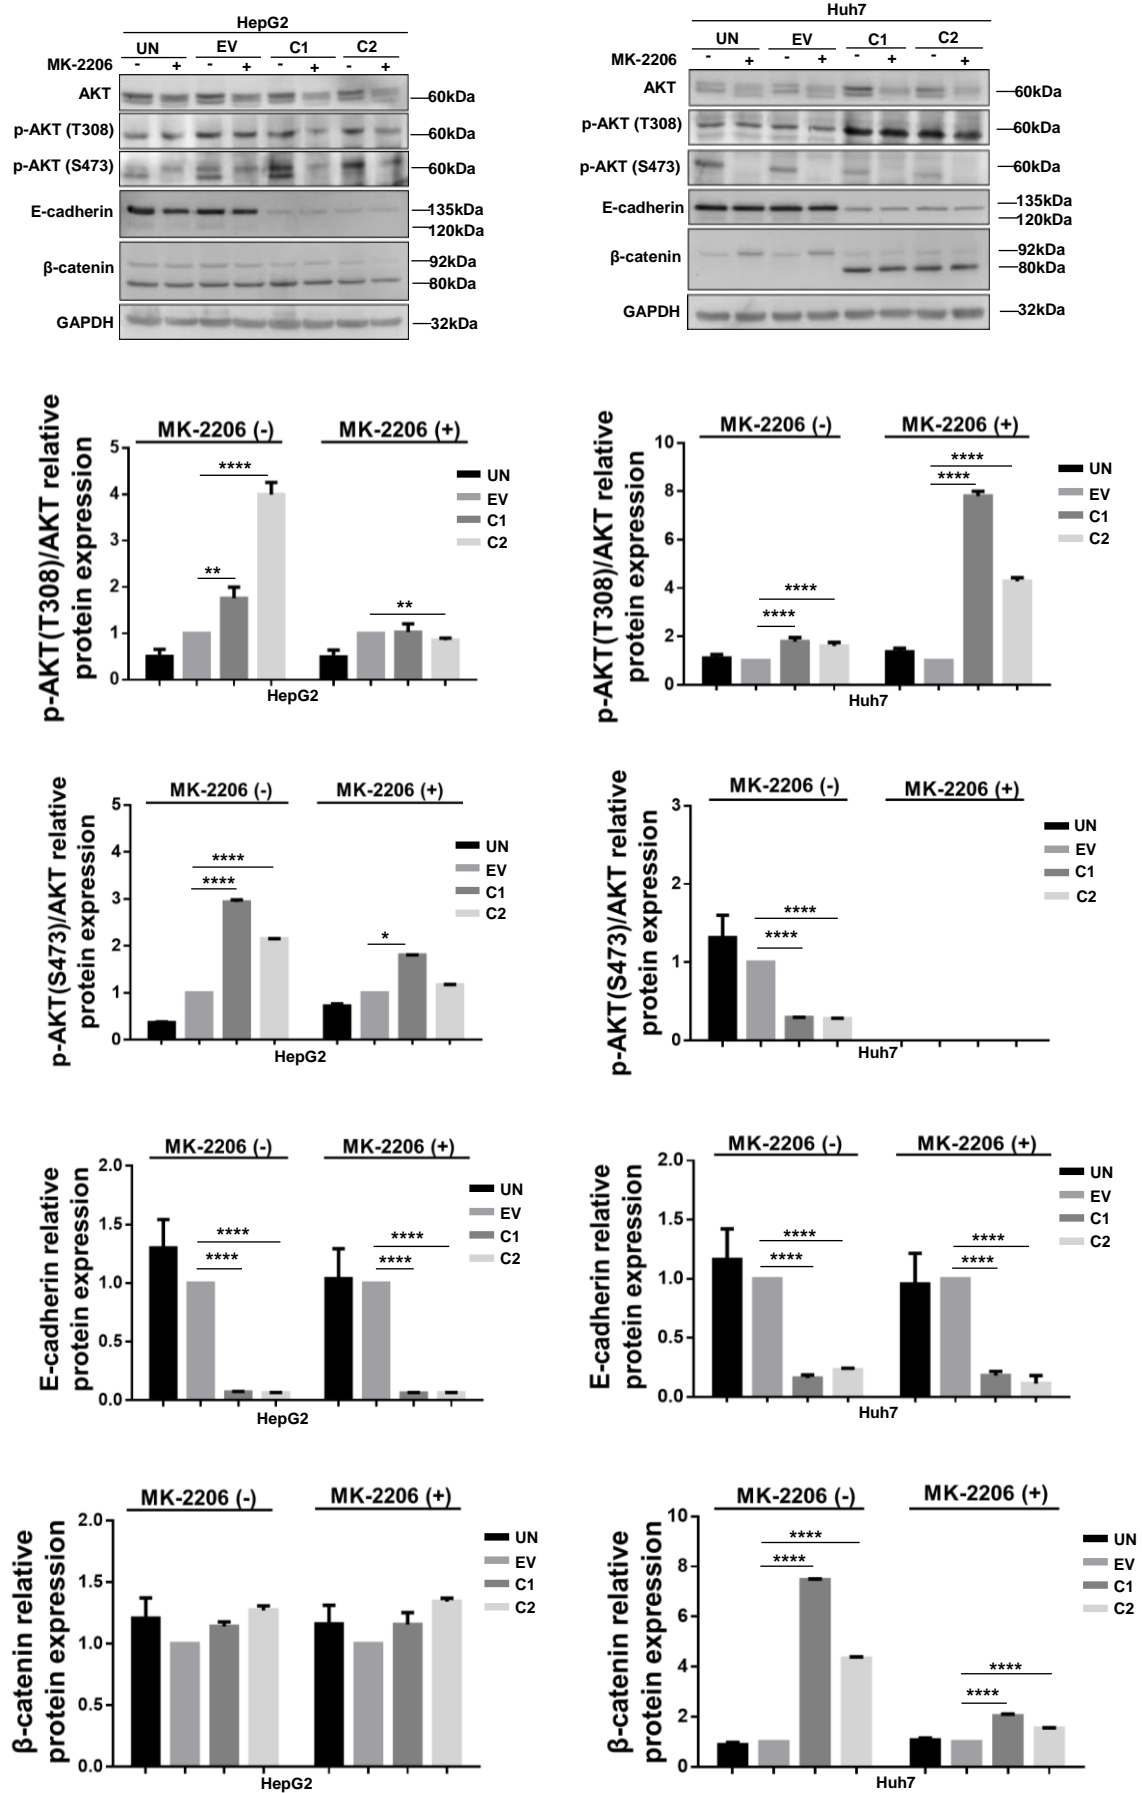

**Figure S5.**

**E**

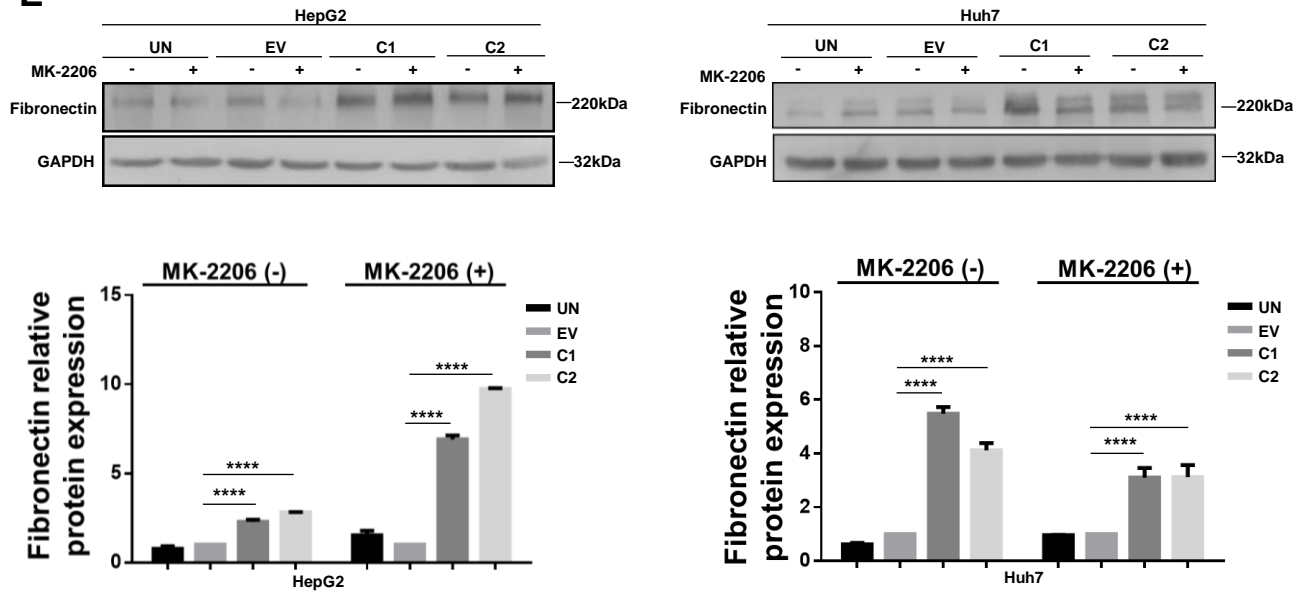

**F**

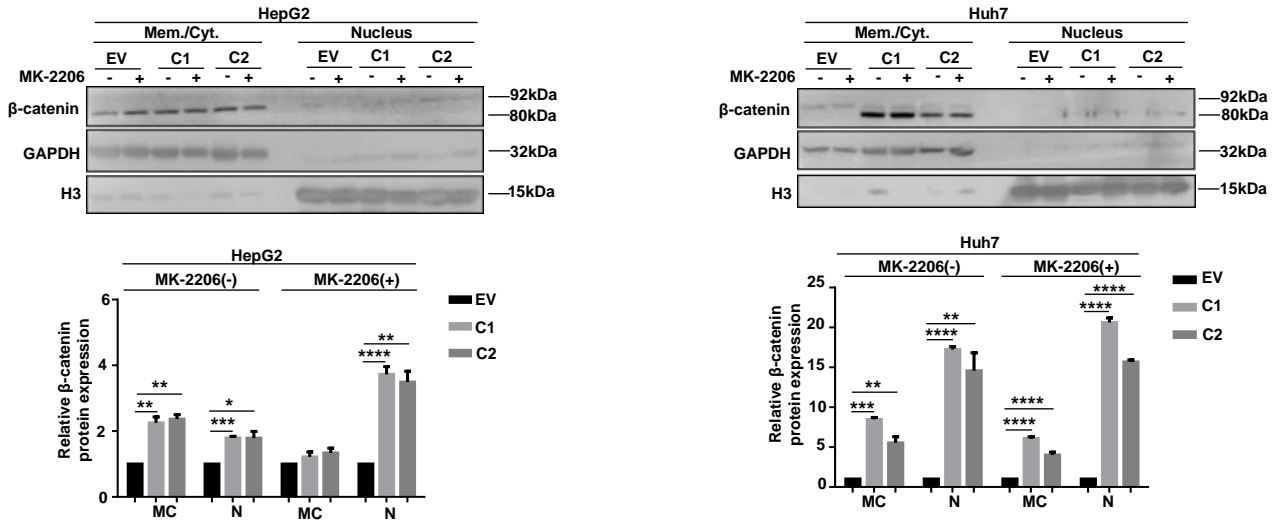

**Figure S6.**

**A**

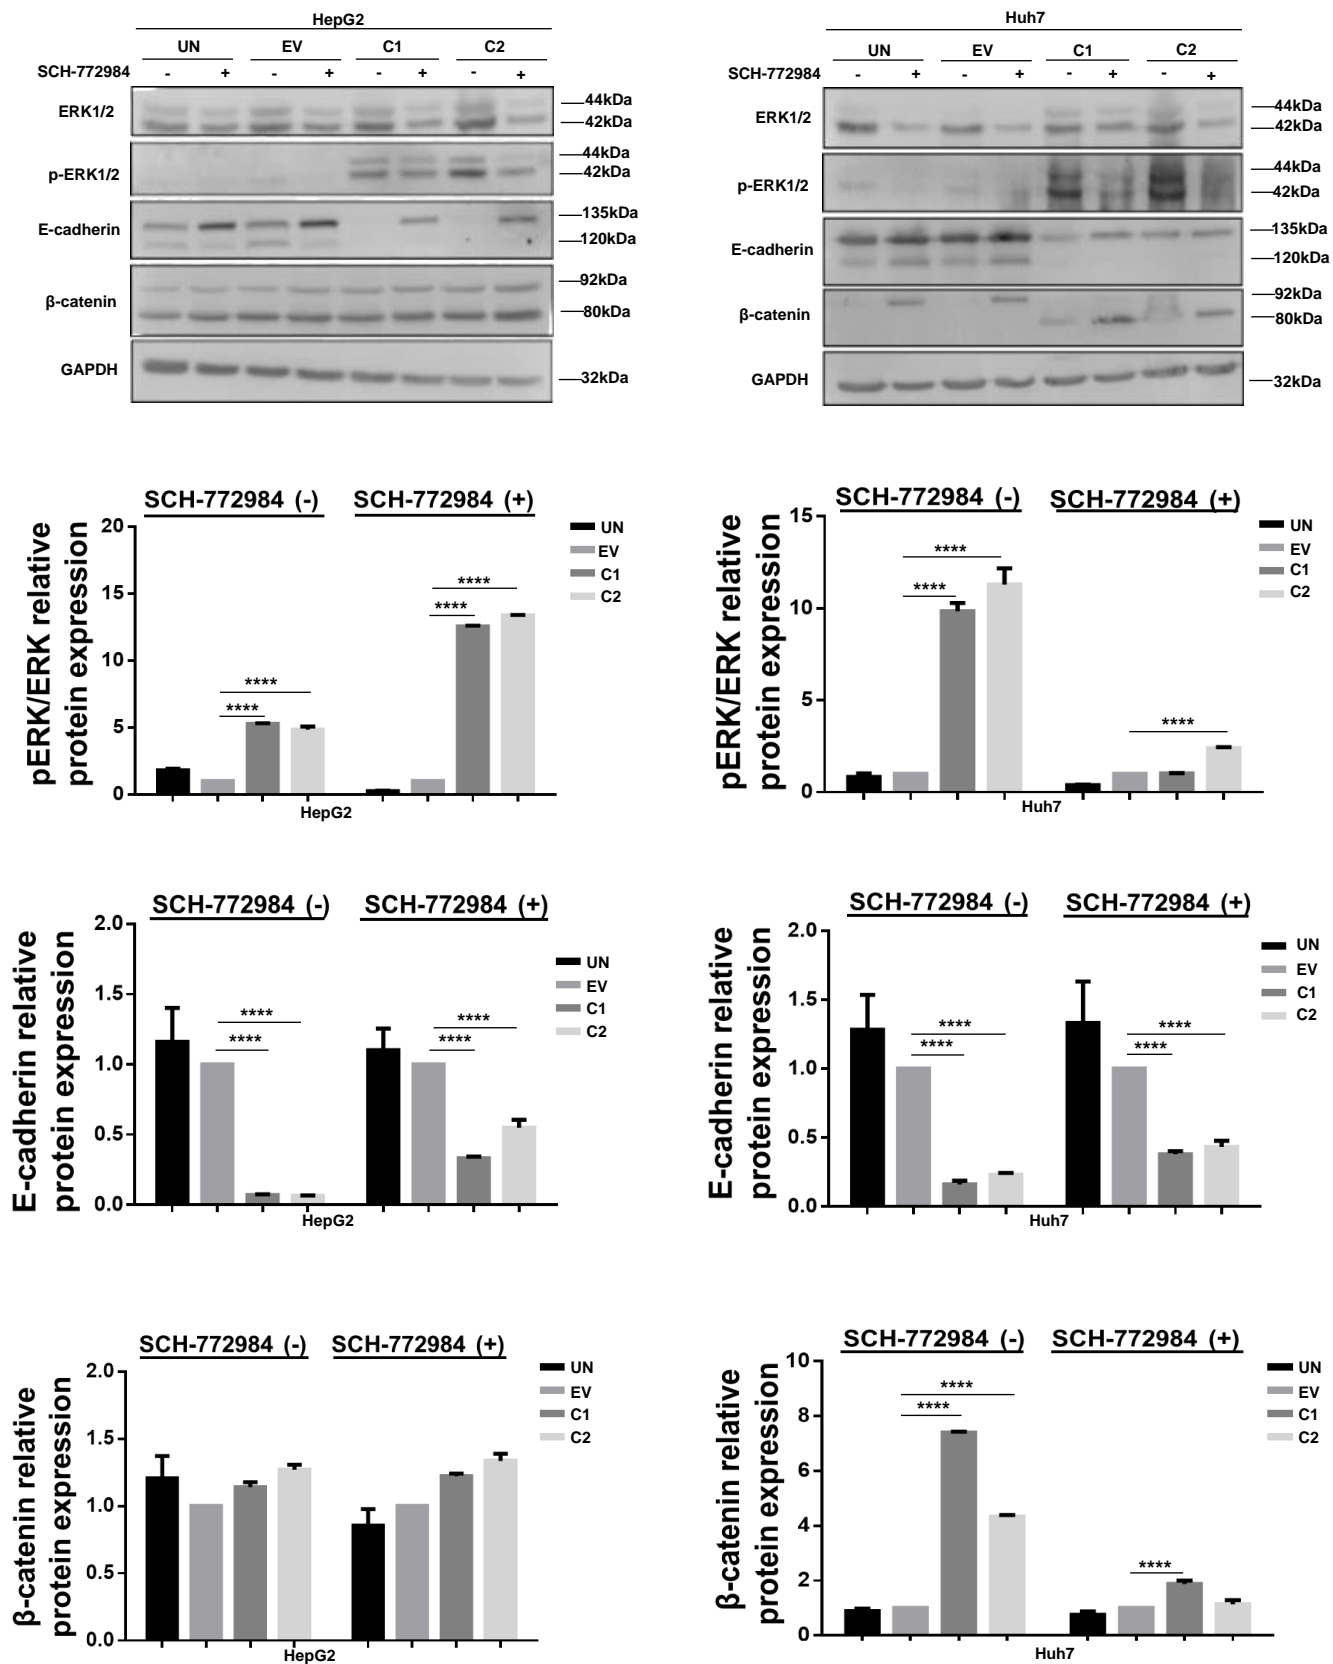

**Figure S6.**

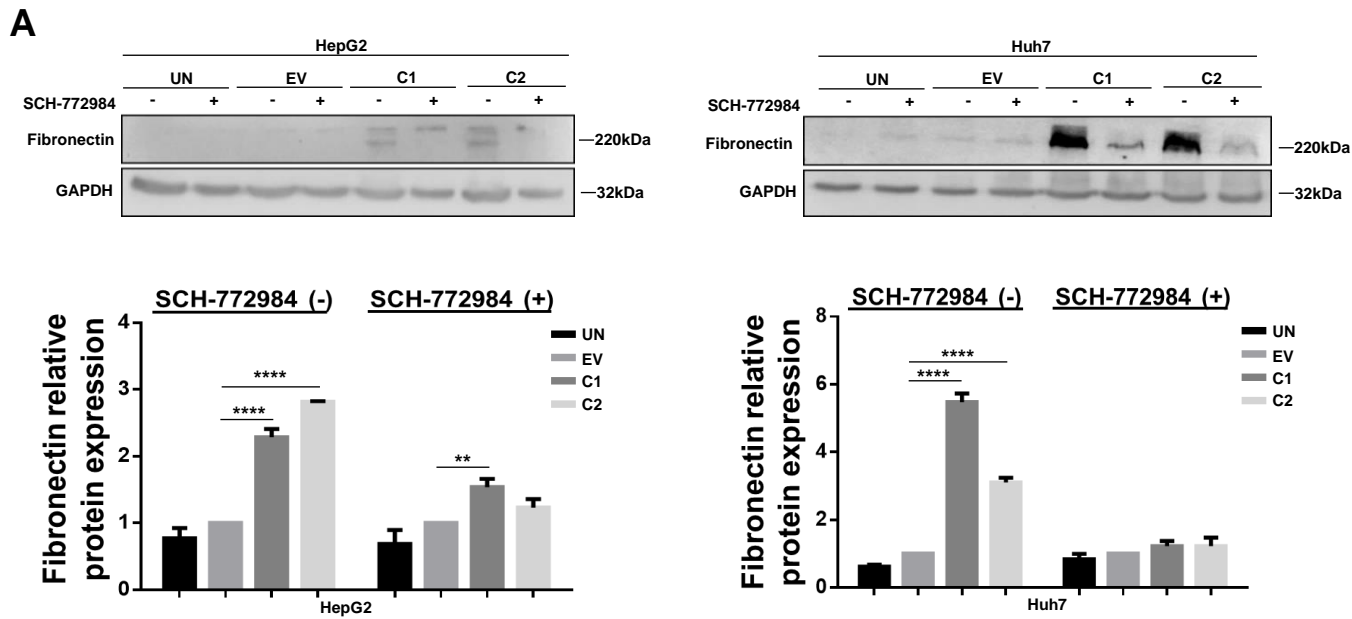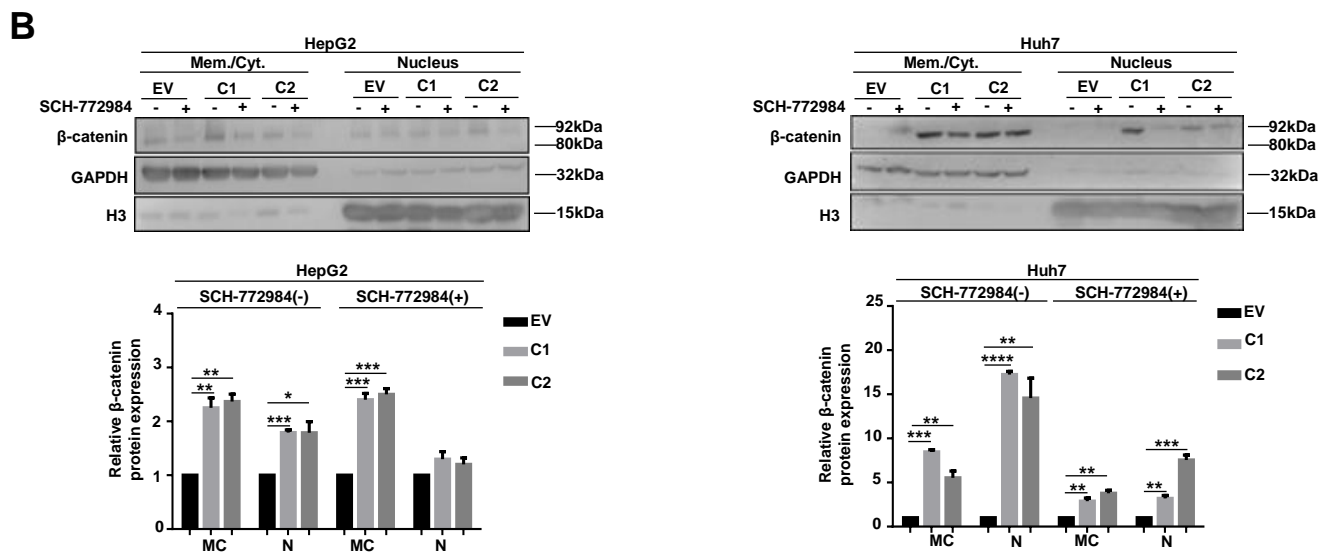

Supplement: MOL2-16-1694-s001.pdf [file MOL2-16-1694-s001.pdf]
